# Supplementary material for: Properties of 3D Printable Poly(lactic acid)/Poly(butylene adipate-co-terephthalate) Blends and Nano Talc Composites
Source: Hindawi journal article supplement (doi:10.1155/2020/8040517), 2020-03-28
Supplement: f1 [file 8040517.f1.docx]

Supplementary data

Figure S1 Scanning profile of surface roughness measurement.

(S1)

Where; Ra is the average surface roughness. It represents the average absolute deviation of the scanned profile points from a mean line [50]. L is sample length.

Figure S2 Schematic observation of interlayer and voids from cross-sectional vertical dumbbell specimen.

Figure S3 SEM images of alignment layers in the PLA/PBAT blends.

Figure S4 SEM images of alignment layers in the 70/30-nano talc composites.
